# Supplementary material for: Effect of water on the effective Goldschmidt tolerance factor and photoelectric conversion efficiency of organic–inorganic perovskite: insights from first-principles calculations
Source: Royal Society of Chemistry journal article supplement (doi:10.1039/c7cp02659e), 2017-01-01
Supplement: c7cp02659e1.pdf [file c7cp02659e1.pdf]

**Supporting Information for:**

**Water effect on effective Goldschmidt tolerance factor and photoelectric conversion efficiency of organic-inorganic perovskite: insight from first-principles calculations**

*Zhen-Kun Tang<sup>1,2</sup>, Ya-Nan Zhu<sup>2</sup>, Zhi-Feng Xu<sup>1</sup>, Li-Min Liu<sup>2\*</sup>*

*<sup>1</sup> College of Physics and Electronics Engineering & College of Chemistry and Materials Science, Hengyang Normal University, Hengyang 421008, China*

*<sup>2</sup> Beijing Computational Science Research Center, Beijing 100084, China*

Email: [limin.liu@csrc.ac.cn](mailto:limin.liu@csrc.ac.cn)

**S1. The geometrical configuration of interstitial H<sub>2</sub>O molecule infiltrated into the MAPbI<sub>3</sub> supercells with different interstitial H<sub>2</sub>O ratios**

Figure S1 (a) shows the geometrical configuration of pure 2×2×1 MAPbI<sub>3</sub> supercell. When a single interstitial H<sub>2</sub>O molecule infiltrate into the 2×2×1 MAPbI<sub>3</sub> supercell, the two hydrogen atoms of interstitial H<sub>2</sub>O molecule will bonding with iodine anion by weak hydrogen-bonds, as shown in the Figure S1 (b). However, there are kinds of geometric constructions for two interstitial H<sub>2</sub>O molecules in the 2×2×1 MAPbI<sub>3</sub> supercell. Considered the crystal structure and symmetry, 13 different configurations of two interstitial H<sub>2</sub>O molecules in the MAPbI<sub>3</sub> supercell were chosen as the possible structures in our calculations, as shown in Figure S1 (c-o). Besides, the corresponding total energies and lattice parameters are listed on the Table S1. We note that the 2H<sub>2</sub>O-1 structure has the lowest total energy of 0.004-0.328 eV among other considered structures. In the 2H<sub>2</sub>O-1 structure, two H<sub>2</sub>O molecules are located on the two sides of two nearby Pb-I6 octahedron. Symmetrical water molecule position results in the smallest total additional dipole moment and crystal lattice distortion. Thus, 2H<sub>2</sub>O-1 structure is the most stable configure with the lowest total energy. Besides, we note that the 2H<sub>2</sub>O-2 structure also has small crystal lattice distortion and total energy. Base on the 2H<sub>2</sub>O-1 and 2H<sub>2</sub>O-2 configure in the MAPbI<sub>3</sub> structure, we built the related configures of the 3, 4, 8, 12, and 16 interstitial H<sub>2</sub>O molecule in the MAPbI<sub>3</sub> structure, shown in the Figure S1 (p-t), respectively.

**Table S1** The formation energies and lattice parameters of two interstitial H<sub>2</sub>O molecules in the MAPbI<sub>3</sub> supercell.

| Structure                | E (eV)   | a (Å)         | b (Å)         | c (Å)         | α(°)          | β(°)          | γ(°)          | V (Å <sup>3</sup> ) |
|--------------------------|----------|---------------|---------------|---------------|---------------|---------------|---------------|---------------------|
| <b>2H<sub>2</sub>O-1</b> | <b>0</b> | <b>17.472</b> | <b>17.438</b> | <b>12.888</b> | <b>88.744</b> | <b>90.484</b> | <b>89.897</b> | <b>3926.234</b>     |
| 2H <sub>2</sub> O-2      | 0.004    | 17.458        | 17.452        | 12.893        | 88.877        | 90.468        | 89.824        | 3927.460            |
| 2H <sub>2</sub> O-3      | 0.236    | 17.448        | 17.450        | 12.911        | 89.273        | 90.251        | 89.942        | 3931.096            |
| 2H <sub>2</sub> O-4      | 0.207    | 17.435        | 17.473        | 12.907        | 88.970        | 90.268        | 89.899        | 3931.387            |
| 2H <sub>2</sub> O-5      | 0.309    | 17.501        | 17.437        | 12.890        | 89.252        | 89.888        | 89.848        | 3933.535            |
| 2H <sub>2</sub> O-6      | 0.241    | 17.474        | 17.419        | 12.905        | 88.908        | 90.610        | 89.824        | 3927.636            |
| 2H <sub>2</sub> O-7      | 0.164    | 17.482        | 17.419        | 12.890        | 88.714        | 90.668        | 89.813        | 3924.269            |
| 2H <sub>2</sub> O-8      | 0.194    | 17.484        | 17.432        | 12.901        | 89.247        | 90.251        | 89.860        | 3931.886            |
| 2H <sub>2</sub> O-9      | 0.154    | 17.484        | 17.426        | 12.896        | 88.887        | 90.501        | 89.826        | 3928.858            |
| 2H <sub>2</sub> O-10     | 0.328    | 17.481        | 17.441        | 12.904        | 88.910        | 90.146        | 89.924        | 3934.129            |
| 2H <sub>2</sub> O-11     | 0.293    | 17.422        | 17.494        | 12.908        | 89.051        | 90.133        | 89.932        | 3933.693            |
| 2H <sub>2</sub> O-12     | 0.304    | 17.404        | 17.514        | 12.898        | 88.971        | 90.258        | 89.813        | 3931.202            |
| 2H <sub>2</sub> O-13     | 0.256    | 17.474        | 17.453        | 12.892        | 89.133        | 90.521        | 89.744        | 3931.453            |

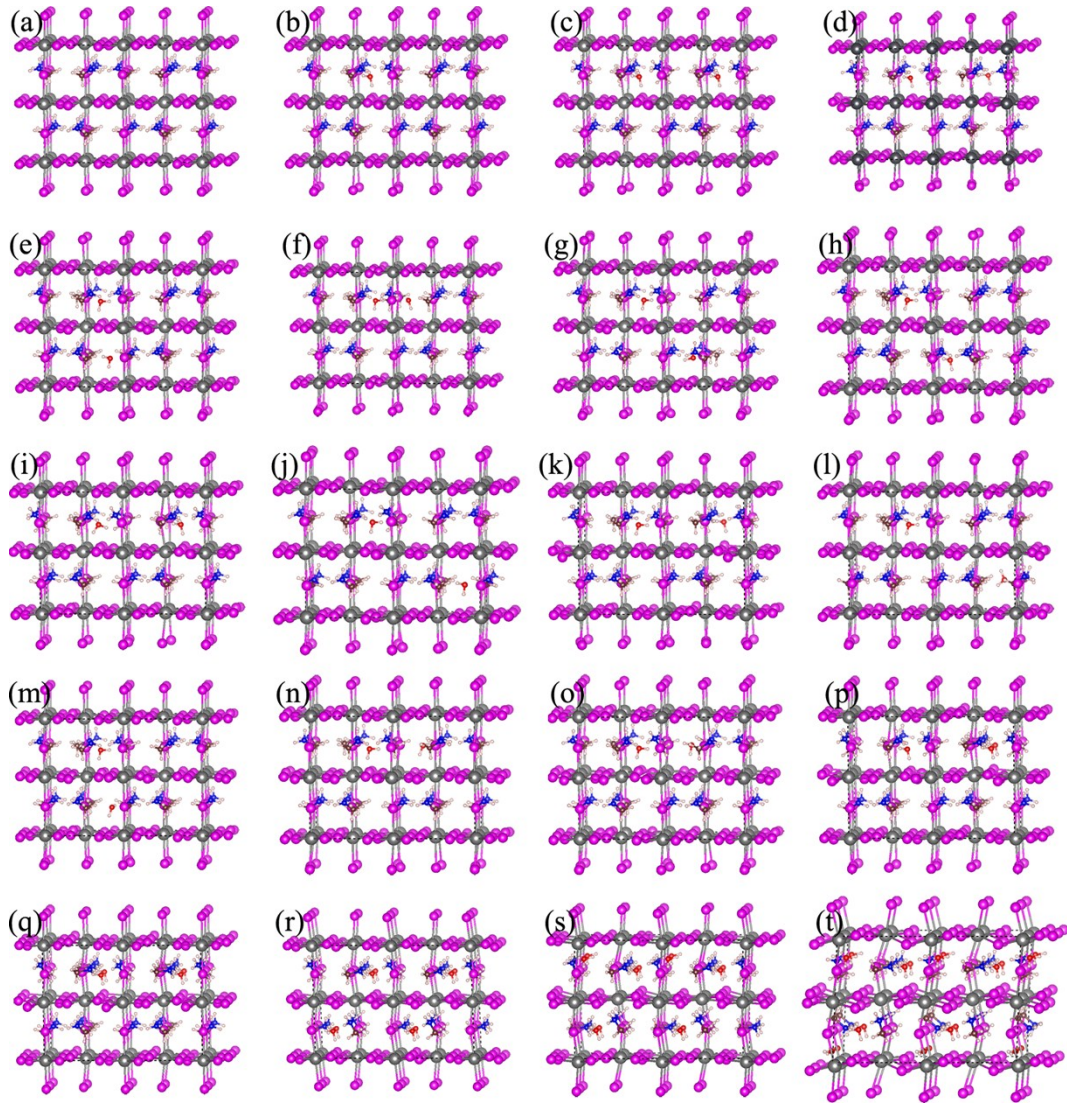

**Figure S1** Snapshots of Li-ion transfer in the LiBOB-DEC (a-c), LiBOB-MPN (d-f) and LiBOB-GLN (g-i) system. The yellow, red, pink, light green, blue, and white balls represent Li, O, B, C, N, and H atoms, respectively.

## S2. The ground state electronic structure of interstitial H<sub>2</sub>O molecule infiltrated MAPbI<sub>3</sub> supercells with different ratios of MAPbI<sub>3</sub> and H<sub>2</sub>O

It is well known that primitive MAPbI<sub>3</sub> structure is a direct band gap semiconductor with a value of 1.50 eV, as shown in the Figure S2 (a). Thus, it is necessary to know whether the MAPbI<sub>3</sub> structures with interstitial H<sub>2</sub>O molecules own unique electronic structures. In order to study the detail electronic structures of the interstitial H<sub>2</sub>O molecule infiltrated MAPbI<sub>3</sub> structures, the ground state band structures for the MA(H<sub>2</sub>O)<sub>x</sub>PbI<sub>3</sub> with seven different interstitial H<sub>2</sub>O ratios are investigated, and the calculated results are shown in Figure S2 (b-h). The band structures show that the MA(H<sub>2</sub>O)<sub>x</sub>PbI<sub>3</sub> structures are semiconductors with direct band gaps at the Gamma point. Besides, the band structures of MA(H<sub>2</sub>O)<sub>x</sub>PbI<sub>3</sub> structures are similar with that of the pure MAPbI<sub>3</sub> structure, which are also semiconductors with direct band gaps. However, the band gaps of MA(H<sub>2</sub>O)<sub>x</sub>PbI<sub>3</sub> structures will increase with the increasing

interstitial  $\text{H}_2\text{O}$  ratio  $x$ . That is to say, all  $\text{MA}(\text{H}_2\text{O})_x\text{PbI}_3$  structures exhibit different kinds of optical absorption properties.

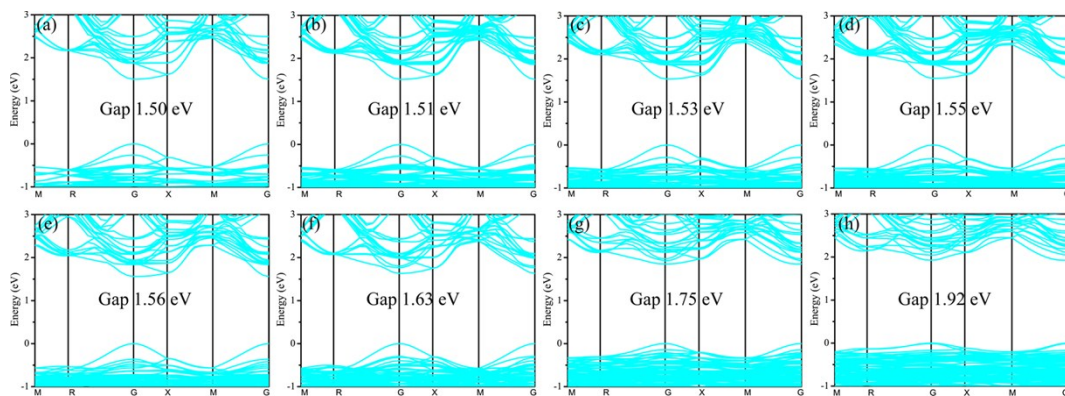

**Figure S2** The calculated band structures of the  $\text{H}_2\text{O}$  molecular insert  $\text{MAPbI}_3$  with different  $\text{H}_2\text{O}:\text{MAPbI}_3$  ratios. The (a-h) represent the band structure of the  $\text{H}_2\text{O}$  molecular insert  $\text{MAPbI}_3$  with  $\text{H}_2\text{O}:\text{MAPbI}_3$  ratio of 0, 1/16, 1/8, 3/16, 1/4, 1/2, 3/4, and 1, respectively.
